# Supplementary material for: Enhancement of vitality and activity of a plant growth-promoting bacteria (PGPB) by atmospheric pressure non-thermal plasma
Source: PubMed Central journal article supplement (PMC6355859; doi:10.1038/s41598-018-38026-z), 2019-01-31
Supplement: 41598_2018_38026_MOESM1_ESM.pdf [file 41598_2018_38026_MOESM1_ESM.pdf]

Supplementary Information

**Enhancement of vitality and activity of a plant growth-promoting bacteria (PGPB) by atmospheric pressure non-thermal plasma**

Sang-Hye Ji<sup>1, 4</sup>, Ju-Sung Kim<sup>1</sup>, Choong-Hwan Lee<sup>2</sup>, Han-Sol Seo<sup>2</sup>, Se-Chul Chun<sup>3</sup>, Jaesung Oh<sup>4</sup>, Eun-Ha Choi<sup>1,5\*</sup>, Gyungsoon Park<sup>1,5\*</sup>

<sup>1</sup>Plasma Bioscience Research Center, Kwangwoon University, Seoul, 01897, Republic of Korea

<sup>2</sup>Department of Bioscience and Biotechnology, Konkuk University, Seoul 05029, Republic of Korea.

<sup>3</sup>Department of Bioresources and food science, College of Life and Environmental Sciences, Konkuk University, Seoul 05029, Republic of Korea

<sup>4</sup>Plasma Technology Research Center, National Fusion Research Institute, Gunsan-si, Jeollabuk-Do, 54004, Republic of Korea

<sup>5</sup>Department of Electrical and Biological Physics, Kwangwoon University, Seoul, 01897, Republic of Korea

\* Corresponding author

Gyungsoon Park

Phone: +82-2-940-8324

Fax: +82-2-940-5664

24 Email: gyungp@kw.ac.kr

25

26 Eun-Ha Choi

27 Phone: +82-2-940-5236

28 Fax: +82-2-940-5664

29 Email: ehchoi@kw.ac.kr

30

31

## 32 **Supplementary Methods**

33

### 34 **Primary metabolites analysis**

#### 35 ***Sample preparation for gas chromatography-time of flight-mass spectrometry (GC-TOF-MS)***

36 ***analysis*** Each bacteria pellet was subjected to extraction with 1 mL of 90% cold methanol  
37 (methanol:water, = 90:10, v/v) and 10  $\mu$ L of internal standard (2-chlorophenylalanine, 0.5  
38 mg/mL) on MM400 mixermill (Retsch®, Haan, Germany) for 5 min at RT with zirconium  
39 bead. The suspension was centrifuged at 15,000 rpm for 5 min. The supernatant was filtered  
40 through a 0.2  $\mu$ m PTEE filters and then evaporated using a Speed Vacuum (Biotron, Seoul,  
41 Korea) for derivatization. Methoximation and silylation were performed for the GC-TOF-MS  
42 analysis. Methyloxime derivatives were obtained by dissolving the dry extracts in 50  $\mu$ L of  
43 methoxyamine hydrochloride (20 mg/mL in pyridine) for 90 min at 30 °C. After methoximation,  
44 samples were silylated for 30 min at 37 °C by adding 50  $\mu$ L of MSTFA, and then 1  $\mu$ L of each  
45 derivatived sample was injected into GC-TOF-MS with splitless mode.

#### 46 ***GC-TOF-MS analysis and data processing for multivariate statistical analysis*** GC-TOF-

47 MS analysis was performed by using Agilent 7890 gas chromatograph system (Agilent  
48 Technologies, Palo Alto, CA, USA) with Agilent 7693 autosampler (Agilent Technologies) and  
49 Pegasus HT TOF MS (LECO, St. Joseph, MI, USA) system. Rtx-5MS column (i.d., 30 m X  
50 0.25 mm, 0.25  $\mu$ m particle size; Restek Corp., Bellefonte, PA, USA) was used with a constant  
51 flow of 1.5 mL/min of helium as carrier gas. The oven temperature was maintained at 75 °C  
52 for 2 min and then raised to 300 °C (15 °C increase per min), holding the temperature for 3  
53 min. The temperatures of the front inlet and transfer line were 250 °C and 240 °C, respectively.  
54 The electron ionization was carried out at -70 eV and full scanning over a range of 50–1,000  
55 m/z was used for mass data collection.

56 The GC-TOF-MS raw data files were converted into NetCDF format using the LECO  
57 Chroma TOF™ software (Version 4.44; LECO Corp.). After conversion, the peak detection,  
58 retention time, and alignment were processed by the Metalign software  
59 (<http://www.metalign.nl>), and the resulting data were exported to an Excel file. Multivariate  
60 statistical analysis was performed using the SIMCA-P+ (Version 12.0, Umetrics; Umea,  
61 Sweden). The significantly differed metabolites were selected by variable important in  
62 projection (VIP) > 0.7 by partial least squares-discriminant analysis (PLS-DA) dataset and *p*-  
63 value < 0.05 by analysis of variance (ANOVA). The box-whisker plots were conducted by the  
64 Statistica 7 software (StatSoft Inc., Tulsa, OK, USA).

65

## 66 **Sequencing bacterial genome**

67 ***PacBio RSII sequencing*** A sample of high-quality and high-molecular-weight DNA is  
68 required to prepare size- selected approximately 20 kb SMRTbell templates. We used  
69 NanoDrop spectrophotometer (Thermo Scientific, Waltham, MA, USA) and a Qubit  
70 fluorometer (Life Technologies, Waltham, MA, USA) to measure the concentration of genomic  
71 DNA. All samples passed screening QC criteria. For PacBio RS sequencing, 8 µg of input  
72 genomic DNA was used for 20 kb library preparation. For gDNA where the size range was less  
73 than 17 kb, we used the Bioanalyzer 2100 (Agilent) to determine the actual size distribution.  
74 The library insert sizes were in the optimal size range. gDNA was sheared with g-TUBE  
75 (Covaris Inc., Woburn, MA, USA) and purified using AMPure PB magnetic beads (Beckman  
76 Coulter Inc., Brea, CA, USA) if the apparent size was greater than 40 kb. The gDNA  
77 concentration was measured using both a NanoDrop spectrophotometer and a Qubit  
78 fluorometer, and approximately 200 ng/µL of gDNA was run on a field-inversion gel. Total  
79 10µL library was prepared using PacBio DNA Template Prep Kit 1.0 (for 3–10 kb). SMRTbell

80 templates were annealed using PacBio DNA/Polymerase Binding Kit P6. The PacBio DNA  
81 Sequencing Kit 4.0 and 8 SMRT cells were used for sequencing. SMRT cells (Pacific  
82 Biosciences, Menlo Park, CA, USA) using C4 chemistry and 240 min movies were captured  
83 for each SMRT cell using the PacBio RS II (Pacific Biosciences) sequencing platform by  
84 Macrogen (Seoul, Korea). The subsequent steps are based on the PacBio Sample Net-Shared  
85 Protocol, which is available at <http://pacificbiosciences.com>.

86 ***Illumina Hiseq sequencing*** Each sequenced sample was prepared according to the Illumina  
87 protocols (TruSeq DNA Sample Prep Kit v2 Support (FC121-2001)). Briefly, 1 µg of genomic  
88 DNA was fragmented by covaris, the fragmented DNA was repaired, an 'A' was ligated to the  
89 3' end, Illumina adapters were then ligated to the fragments, and the sample was size selected  
90 aiming for a 400~500 base pair products. The size selected product was PCR amplified, and  
91 the final product was validated using the Agilent Bioanalyzer. Then, we sequenced using the  
92 HiSeq™ 4000 platform (Illumina, San Diego, USA)

93 ***Assembly, gene prediction/annotation*** Pacbio raw data were analyzed using SMRT Analysis  
94 Software (v 2.3). In this software, pacbio subreads were assembled by using HGAP3 protocol,  
95 to obtain assembled DNA sequence data. This assembled DNA sequence was corrected by  
96 Quiver (v1), the error correction step performed through SMRTpipe (v2.3.0.139497). In the  
97 next step after De Novo Assembly, HiSeq reads were applied for sequence compensation to  
98 construct contigs more accurately using Pilon (v1.21) tool. After correction step, Prokka was  
99 used for gene prediction and annotation. For additional annotation, the corrected sequences  
100 were searched against the GenBank non-redundant (NR) database using blastx (v2.4.0+).

101

102 ***Variant calling*** The filtered reads were mapped to reference genome using BWA. In this  
103 process, sufficient read depth was needed for more accurate analysis. After mapping,  
104 duplicated reads were removed, and variants (SNPs and short indels) were captured through  
105 aligned reads' information using by SAMTools. The variants were classified by each  
106 chromosomes or scaffolds, and the information of the location was marked.

107

108 **Supplementary Table S1.** Summary of 2-D gel electrophoresis  
 109

|                                                                                       |                                                  |
|---------------------------------------------------------------------------------------|--------------------------------------------------|
| Total number of protein spots                                                         | <sup>1</sup> B gel: 518 <sup>2</sup> PB gel: 585 |
| Number of spots paired in B and PB gel                                                | 436                                              |
| Number of spots non-paired in B and PB gel                                            | 231                                              |
| Number of spots with increased intensity more than 2-fold in PB gel compared to B gel | 38                                               |
| Number of spots with decreased intensity more than 2-fold in PB gel compared to B gel | 57                                               |

110 <sup>1</sup> 2-dimentional electrophoretic gel for proteins extracted from bacteria (non-plasma treated  
 111 bacteria)

112 <sup>2</sup> 2-dimentional electrophoretic gel for proteins extracted from plasma treated bacteria  
 113

114 **Supplementary Table S2.** Spots with different intensity in PB (Plasma treated bacteria)  
 115 compared to B (Non-plasma treated bacteria) gel  
 116

| More than 2-fold increase in intensity in PB |           |            |              | More than 2-fold decrease in intensity in PB |           |            |              |
|----------------------------------------------|-----------|------------|--------------|----------------------------------------------|-----------|------------|--------------|
| Spot ID number                               | B (% vol) | PB (% vol) | Ratio (PB/B) | Spot ID number                               | B (% vol) | PB (% vol) | Ratio (PB/B) |
| 69                                           | 0.457     | 0.909      | 2            | 53                                           | 0.056     | 0.027      | 2.1          |
| 82                                           | 0.112     | 0.315      | 2.8          | 122                                          | 0.192     | 0.097      | 2            |
| 88                                           | 0.02      | 0.08       | 3.9          | 134                                          | 0.234     | 0.117      | 2            |
| 110                                          | 0.058     | 0.123      | 2.1          | 142                                          | 0.13      | 0.047      | 2.7          |
| 114                                          | 0.062     | 0.15       | 2.4          | <u>150</u>                                   | 0.388     | 0.076      | 5.1          |
| 121                                          | 0.062     | 0.199      | 3.2          | 151                                          | 0.134     | 0.066      | 2            |
| 133                                          | 0.025     | 0.05       | 2            | 153                                          | 0.17      | 0.054      | 3.1          |
| 152                                          | 0.058     | 0.24       | 4.1          | 192                                          | 0.118     | 0.032      | 3.7          |
| 167                                          | 0.029     | 0.058      | 2            | 202                                          | 0.183     | 0.084      | 2.2          |
| 171                                          | 0.032     | 0.095      | 3            | 233                                          | 0.094     | 0.043      | 2.2          |
| 179                                          | 0.044     | 0.104      | 2.4          | 236                                          | 0.312     | 0.111      | 2.8          |
| 186                                          | 0.079     | 0.229      | 2.9          | 254                                          | 0.32      | 0.139      | 2.3          |
| <u>214*</u>                                  | 0.103     | 0.366      | 3.5          | 257                                          | 0.447     | 0.228      | 2            |
| 225                                          | 0.163     | 0.355      | 2.2          | 298                                          | 0.066     | 0.028      | 2.3          |
| <u>232</u>                                   | 0.065     | 0.337      | 5.2          | 300                                          | 0.163     | 0.04       | 4.1          |
| 241                                          | 0.135     | 0.275      | 2            | 314                                          | 0.302     | 0.147      | 2.1          |
| 250                                          | 0.036     | 0.073      | 2.1          | <u>325</u>                                   | 0.852     | 0.189      | 4.5          |
| <u>260</u>                                   | 0.034     | 0.599      | 17.5         | 328                                          | 0.863     | 0.422      | 2            |
| 279                                          | 0.032     | 0.082      | 2.6          | 332                                          | 0.189     | 0.082      | 2.3          |
| 291                                          | 0.042     | 0.108      | 2.5          | 341                                          | 0.104     | 0.051      | 2            |
| <u>339</u>                                   | 0.084     | 0.375      | 4.5          | 343                                          | 0.211     | 0.068      | 3.1          |
| 355                                          | 0.043     | 0.086      | 2            | 354                                          | 0.607     | 0.301      | 2            |
| 357                                          | 0.025     | 0.056      | 2.2          | 356                                          | 0.109     | 0.055      | 2            |
| <u>373</u>                                   | 0.097     | 0.321      | 3.3          | 390                                          | 0.147     | 0.035      | 4.2          |
| 376                                          | 0.056     | 0.117      | 2.1          | 440                                          | 0.078     | 0.028      | 2.8          |
| 426                                          | 0.094     | 0.187      | 2            | 455                                          | 0.392     | 0.188      | 2.1          |
| <u>447</u>                                   | 0.021     | 0.236      | 11.3         | 459                                          | 0.082     | 0.041      | 2            |
| 516                                          | 0.079     | 0.173      | 2.2          | 476                                          | 1.485     | 0.4        | 3.7          |
| 557                                          | 0.039     | 0.134      | 3.4          | 480                                          | 0.162     | 0.039      | 4.1          |
| 642                                          | 0.076     | 0.236      | 3.1          | 482                                          | 0.176     | 0.061      | 2.9          |
| 660                                          | 0.067     | 0.147      | 2.2          | <u>484</u>                                   | 0.854     | 0.186      | 4.6          |
| 764                                          | 0.479     | 1.078      | 2.3          | 493                                          | 0.095     | 0.048      | 2            |
| <u>765</u>                                   | 0.222     | 0.95       | 4.3          | 495                                          | 0.392     | 0.11       | 3.6          |
| 796                                          | 0.437     | 1.242      | 2.8          | 509                                          | 0.104     | 0.05       | 2.1          |
| 987                                          | 0.045     | 0.133      | 2.9          | 512                                          | 0.131     | 0.035      | 3.8          |
| 988                                          | 0.029     | 0.075      | 2.6          | 558                                          | 0.239     | 0.08       | 3            |
| 989                                          | 0.024     | 0.048      | 2            | 562                                          | 0.411     | 0.169      | 2.4          |
| 1011                                         | 0.033     | 0.065      | 2            | 568                                          | 0.06      | 0.03       | 2            |
|                                              |           |            |              | 596                                          | 0.22      | 0.096      | 2.3          |
|                                              |           |            |              | 611                                          | 0.265     | 0.129      | 2            |
|                                              |           |            |              | <u>620</u>                                   | 0.349     | 0.09       | 3.9          |
|                                              |           |            |              | 621                                          | 0.097     | 0.038      | 2.5          |
|                                              |           |            |              | 628                                          | 0.209     | 0.055      | 3.8          |
|                                              |           |            |              | 662                                          | 0.413     | 0.205      | 2            |



|            |       |       |     |
|------------|-------|-------|-----|
| 664        | 0.107 | 0.043 | 2.5 |
| <u>687</u> | 0.509 | 0.129 | 3.9 |
| 697        | 0.08  | 0.041 | 2   |
| <u>710</u> | 0.222 | 0.049 | 4.5 |
| <u>739</u> | 0.223 | 0.042 | 5.3 |
| 754        | 0.313 | 0.109 | 2.9 |
| 827        | 0.149 | 0.07  | 2.1 |
| 838        | 0.191 | 0.093 | 2   |
| 855        | 0.102 | 0.045 | 2.3 |
| 1001       | 0.033 | 0.017 | 2   |
| 1007       | 0.064 | 0.025 | 2.6 |
| 1008       | 0.041 | 0.014 | 3   |
| 1010       | 0.03  | 0.013 | 2.3 |

117 \* Underlined numbers represent protein spots of which level is increased or decreased more  
118 than 3-fold. These spots were further analyzed for protein identification using nano LS-MS/MS.  
119

120  
121

**Supplementary Table S3. Spots found only in B (non-plasma treated bacteria) gel**

| Spot ID number | Area    | Vol     | %Vol      | Spot ID number | Area    | Vol     | %Vol      |
|----------------|---------|---------|-----------|----------------|---------|---------|-----------|
| 50             | 6.82154 | 538.08  | 0.0267688 | 410            | 9.33253 | 1111.31 | 0.0552863 |
| 54             | 5.94269 | 226.521 | 0.0112692 | 414            | 7.00289 | 817.409 | 0.0406651 |
| 56             | 7.22608 | 639.959 | 0.0318372 | 420            | 9.29068 | 850.535 | 0.0423131 |
| 72             | 5.88689 | 658.327 | 0.032751  | 430            | 10.9647 | 2338.43 | 0.116334  |
| 89             | 5.23124 | 380.287 | 0.0189188 | 443            | 10.7554 | 1195.1  | 0.0594548 |
| 92             | 16.7121 | 6127.42 | 0.304832  | 453            | 12.5829 | 2617.78 | 0.130231  |
| 94             | 10.03   | 2174.58 | 0.108183  | 461            | 8.64898 | 642.362 | 0.0319567 |
| 98             | 6.57044 | 900.783 | 0.0448129 | 462            | 0.01395 | 0       | 0         |
| 101            | 10.1835 | 1607.89 | 0.0799905 | 468            | 8.09098 | 1700.74 | 0.0846096 |
| 102            | 16.3912 | 3331.3  | 0.165728  | 471            | 12.276  | 3109.93 | 0.154715  |
| 111            | 16.7818 | 3271.06 | 0.162731  | 490            | 23.7289 | 2852.38 | 0.141902  |
| 115            | 9.15118 | 633.371 | 0.0315094 | 506            | 9.51388 | 1367.25 | 0.0680192 |
| 123            | 10.4206 | 1102.41 | 0.0548434 | 518            | 15.8751 | 1877    | 0.0933783 |
| 138            | 7.11449 | 689.681 | 0.0343108 | 525            | 10.6996 | 633.636 | 0.0315226 |
| 140            | 10.2811 | 2160.96 | 0.107505  | 526            | 12.9037 | 1505.29 | 0.0748861 |
| 161            | 9.17908 | 3696.04 | 0.183874  | 530            | 9.96028 | 1372.23 | 0.0682668 |
| 176            | 8.59318 | 702.638 | 0.0349554 | 535            | 16.4749 | 2101.76 | 0.10456   |
| 180            | 8.38393 | 1782.38 | 0.0886712 | 559            | 14.5777 | 1534.43 | 0.0763359 |
| 197            | 8.74663 | 1977.23 | 0.0983646 | 573            | 25.0123 | 9749.38 | 0.48502   |
| 201            | 12.4434 | 2311    | 0.114969  | 576            | 8.76058 | 1803.31 | 0.0897127 |
| 203            | 9.37438 | 1044.11 | 0.0519433 | 583            | 10.5183 | 2729.16 | 0.135773  |
| 205            | 7.71433 | 605.06  | 0.030101  | 586            | 13.7407 | 2060.98 | 0.102531  |
| 215            | 5.42654 | 614.538 | 0.0305725 | 602            | 7.95148 | 695.018 | 0.0345763 |
| 222            | 12.6805 | 1857.66 | 0.0924164 | 634            | 14.4382 | 1343.91 | 0.0668577 |
| 227            | 6.76574 | 1884.12 | 0.0937326 | 650            | 19.6695 | 3774.4  | 0.187772  |
| 228            | 17.298  | 5806.41 | 0.288862  | 652            | 13.5873 | 1282.27 | 0.0637913 |
| 230            | 9.96028 | 2266.12 | 0.112737  | 668            | 14.6754 | 4008    | 0.199393  |
| 234            | 9.13723 | 1221.4  | 0.0607633 | 683            | 23.6731 | 4687.97 | 0.233221  |
| 244            | 6.34724 | 1574.85 | 0.078347  | 694            | 18.5674 | 4931.11 | 0.245317  |
| 258            | 21.1063 | 7537.21 | 0.374967  | 696            | 14.0616 | 1604.46 | 0.0798197 |
| 264            | 8.11888 | 2105.76 | 0.104759  | 711            | 24.1613 | 4599.61 | 0.228825  |
| 276            | 16.8516 | 5303.43 | 0.263839  | 733            | 14.5917 | 493.961 | 0.024574  |
| 286            | 12.8479 | 5897.03 | 0.29337   | 734            | 19.8229 | 2295.02 | 0.114175  |
| 288            | 7.56088 | 699.361 | 0.0347924 | 749            | 20.7715 | 3269.78 | 0.162667  |
| 296            | 10.2811 | 2002.86 | 0.0996397 | 775            | 16.6981 | 3613.63 | 0.179774  |
| 297            | 12.7224 | 3354.84 | 0.166899  | 813            | 15.903  | 2743.47 | 0.136484  |
| 335            | 17.1864 | 8793.2  | 0.437451  | 823            | 18.3303 | 3407.61 | 0.169525  |
| 351            | 9.58363 | 3050.57 | 0.151762  | 852            | 29.839  | 13071.9 | 0.650313  |
| 366            | 11.6343 | 2014.03 | 0.100196  | 996            | 10.4485 | 1314.2  | 0.0653798 |
| 367            | 12.1783 | 3880.36 | 0.193043  | 997            | 13.3501 | 2353.96 | 0.117107  |
| 402            | 9.02563 | 3224.48 | 0.160414  | 1027           | 7.93753 | 642.87  | 0.031982  |

122  
123

**Supplementary Table S4.** Spots found in only PB (Plasma treated bacteria) gel

| Spot number | Area    | Vol     | %Vol      | Spot number | Area    | Vol     | %Vol      |
|-------------|---------|---------|-----------|-------------|---------|---------|-----------|
| 65          | 15.7914 | 788.894 | 0.0289341 | 555         | 16.0146 | 3472.47 | 0.127359  |
| 68          | 8.38393 | 944.455 | 0.0346396 | 560         | 14.4103 | 523.109 | 0.019186  |
| 77          | 10.1556 | 1168.04 | 0.0428402 | 571         | 12.8898 | 2148.76 | 0.0788096 |
| 94          | 8.06308 | 766.104 | 0.0280983 | 577         | 13.2804 | 2491.86 | 0.0913937 |
| 103         | 6.36119 | 572.646 | 0.0210029 | 578         | 19.2649 | 2525.02 | 0.0926096 |
| 104         | 11.9412 | 1461.13 | 0.0535898 | 580         | 11.0484 | 1329.07 | 0.0487461 |
| 116         | 9.12328 | 1266.79 | 0.046462  | 581         | 16.2238 | 3703.3  | 0.135825  |
| 118         | 8.35603 | 1316.67 | 0.0482912 | 583         | 9.91843 | 823.501 | 0.0302034 |
| 127         | 10.3369 | 934.698 | 0.0342818 | 587         | 11.1739 | 1794.9  | 0.0658313 |
| <u>141</u>  | 13.8384 | 3139.31 | 0.11514   | 591         | 8.25838 | 557.511 | 0.0204477 |
| 142         | 9.69523 | 3003.57 | 0.110161  | 592         | 11.8017 | 2786.55 | 0.102202  |
| 145         | 10.6717 | 1737.97 | 0.0637433 | 593         | 28.4161 | 7372.56 | 0.270402  |
| 153         | 11.7877 | 1235.49 | 0.045314  | 594         | 16.0983 | 1693.83 | 0.0621245 |
| 167         | 9.06748 | 1903.31 | 0.0698072 | 598         | 13.9779 | 1508.61 | 0.0553309 |
| 170         | 14.8707 | 2937.4  | 0.107735  | 605         | 20.0043 | 5014.32 | 0.18391   |
| 179         | 8.81638 | 362.474 | 0.0132944 | 606         | 10.8391 | 2784.01 | 0.102109  |
| 186         | 9.79288 | 1027.27 | 0.0376769 | <u>612</u>  | 18.0094 | 4668.98 | 0.171243  |
| 205         | 11.1321 | 997.395 | 0.0365813 | 622         | 13.2246 | 2579.61 | 0.0946118 |
| 250         | 24.8309 | 8024.43 | 0.294311  | 641         | 15.052  | 2927.96 | 0.107388  |
| 251         | 12.3597 | 3385.7  | 0.124177  | 665         | 25.933  | 5026.75 | 0.184365  |
| 252         | 17.6886 | 4094.06 | 0.150157  | 667         | 17.6049 | 1645.81 | 0.0603633 |
| 254         | 33.4241 | 7493.16 | 0.274825  | 671         | 30.104  | 5853.76 | 0.214697  |
| 256         | 16.7121 | 5674.5  | 0.208123  | 676         | 13.9639 | 1308.41 | 0.0479883 |
| 261         | 10.323  | 1393.37 | 0.0511042 | 692         | 15.7216 | 3292.85 | 0.120771  |
| 266         | 16.4052 | 3043.71 | 0.111634  | 695         | 14.2429 | 2477.99 | 0.0908848 |
| 270         | 14.8009 | 4521.68 | 0.165841  | 697         | 20.5483 | 2736.15 | 0.100353  |
| 274         | 11.7738 | 1289.26 | 0.0472859 | 700         | 23.5476 | 3924.18 | 0.143927  |
| <u>284</u>  | 14.9125 | 4616.6  | 0.169322  | 704         | 15.9588 | 2250.38 | 0.082537  |
| 293         | 12.7642 | 1739.02 | 0.0637817 | 711         | 19.4602 | 2185.48 | 0.0801567 |
| 295         | 9.03958 | 4316.97 | 0.158333  | 716         | 12.6666 | 2170.25 | 0.079598  |
| 296         | 8.42578 | 555.81  | 0.0203853 | 718         | 11.2995 | 1043.29 | 0.0382646 |
| 301         | 5.70554 | 1235.2  | 0.0453033 | 721         | 22.4316 | 4063.25 | 0.149027  |
| 306         | 13.3641 | 1624.03 | 0.0595642 | 722         | 21.0366 | 3514.93 | 0.128916  |
| 308         | 14.5359 | 2719.95 | 0.0997593 | 725         | 21.4969 | 4808.51 | 0.176361  |
| <u>314</u>  | 33.7729 | 20046.6 | 0.735245  | 726         | 19.1254 | 3111.95 | 0.114136  |
| 325         | 14.3266 | 1618.63 | 0.0593662 | 739         | 13.3083 | 2007.39 | 0.0736246 |
| 335         | 8.98378 | 1002.06 | 0.0367526 | 742         | 19.9903 | 5140.02 | 0.18852   |
| 341         | 14.5219 | 1632.82 | 0.0598867 | 743         | 36.9256 | 9168.73 | 0.33628   |
| 342         | 9.19303 | 2707.74 | 0.0993113 | 746         | 15.4566 | 2796.29 | 0.102559  |
| 343         | 16.7679 | 5009.63 | 0.183737  | 756         | 22.8919 | 3145.22 | 0.115357  |
| 346         | 10.7554 | 1536.06 | 0.056338  | 762         | 16.6842 | 3577.64 | 0.131216  |
| 355         | 6.64019 | 1000.98 | 0.0367127 | 763         | 25.5284 | 4212.95 | 0.154518  |
| 358         | 6.24959 | 862.414 | 0.0316306 | 767         | 20.3112 | 3408.91 | 0.125028  |
| 360         | 8.90008 | 951.514 | 0.0348985 | 777         | 18.414  | 2721.54 | 0.0998175 |
| 362         | 13.6291 | 2623.64 | 0.0962269 | 781         | 27.593  | 4792.31 | 0.175767  |
| 365         | 10.6717 | 534.507 | 0.019604  | 782         | 35.4887 | 9287.86 | 0.34065   |
| 377         | 12.6108 | 2346.62 | 0.0860667 | 787         | 19.3486 | 3378.1  | 0.123898  |
| 389         | 11.7738 | 2381.33 | 0.0873397 | 788         | 23.2546 | 5836.24 | 0.214055  |

|            |         |         |           |            |         |         |           |
|------------|---------|---------|-----------|------------|---------|---------|-----------|
| 391        | 14.2987 | 3950.13 | 0.144878  | 813        | 21.9852 | 2247.02 | 0.0824136 |
| 401        | 12.834  | 1506.64 | 0.0552588 | 817        | 20.2554 | 2795.87 | 0.102544  |
| 406        | 11.5506 | 2315.15 | 0.0849124 | 825        | 15.9867 | 985.717 | 0.036153  |
| 408        | 7.93753 | 1169.44 | 0.0428913 | 836        | 15.7216 | 1439.48 | 0.0527957 |
| 409        | 12.1923 | 1595.18 | 0.0585063 | 846        | 34.3867 | 7057.67 | 0.258853  |
| 415        | 12.6666 | 4298.23 | 0.157645  | 848        | 32.4476 | 9135.96 | 0.335078  |
| 421        | 10.6996 | 1853.17 | 0.0679685 | 855        | 16.5447 | 3021.35 | 0.110814  |
| 422        | 19.0557 | 2730.01 | 0.100128  | 869        | 18.1908 | 1069.14 | 0.0392128 |
| 424        | 16.2517 | 2971.92 | 0.109001  | 887        | 15.9867 | 1798.22 | 0.0659531 |
| 431        | 6.62624 | 1250.77 | 0.0458745 | <u>891</u> | 25.7237 | 15224.9 | 0.5584    |
| 432        | 10.588  | 2610.9  | 0.0957596 | 918        | 15.0241 | 966.772 | 0.0354582 |
| 438        | 11.8854 | 2173.71 | 0.0797249 | 935        | 13.4199 | 1319.03 | 0.0483777 |
| 450        | 14.0755 | 6273.75 | 0.230101  | 938        | 18.6651 | 2819.85 | 0.103423  |
| 454        | 13.6989 | 2422.8  | 0.0888606 | 940        | 10.6857 | 825.865 | 0.0302901 |
| 455        | 13.7268 | 1369.53 | 0.0502301 | 942        | 8.38393 | 968.853 | 0.0355345 |
| 458        | 16.6842 | 5517.02 | 0.202347  | 943        | 14.787  | 1978.01 | 0.072547  |
| 465        | 13.2385 | 2604.73 | 0.0955333 | 967        | 12.4852 | 759.268 | 0.0278476 |
| 474        | 21.8875 | 5838.1  | 0.214123  | 1025       | 13.3501 | 863.419 | 0.0316675 |
| 480        | 13.2804 | 975.214 | 0.0357678 | 1027       | 9.16513 | 697.122 | 0.0255682 |
| <u>485</u> | 25.2494 | 14005.6 | 0.513681  | 1028       | 9.16513 | 618.43  | 0.0226821 |
| 489        | 10.4206 | 1855.3  | 0.0680467 | 1032       | 10.4485 | 1146.48 | 0.0420492 |
| 492        | 10.4206 | 1195.38 | 0.0438426 | 1036       | 13.3501 | 1600.84 | 0.0587139 |
| <u>514</u> | 17.577  | 7860.69 | 0.288305  | 1039       | 9.91843 | 1532.61 | 0.0562114 |
| 518        | 13.8663 | 1179.41 | 0.0432572 | 1042       | 7.93753 | 750.927 | 0.0275416 |
| 531        | 12.8898 | 1635.3  | 0.0599776 | 1048       | 10.4485 | 988.355 | 0.0362498 |
| 533        | 12.8479 | 1493.29 | 0.0547691 | 1050       | 18.3721 | 1865.84 | 0.0684332 |
| 541        | 14.0895 | 1099.58 | 0.0403291 |            |         |         |           |

126

127

128  
129

**Supplementary Table S5.** Primary metabolites\* identified by GC-TOF-MS analysis

| Peak                       | Tentative identification                     | RT (min)     | Mass fragment pattern                    | Unique Mass | TMS      | ID            |
|----------------------------|----------------------------------------------|--------------|------------------------------------------|-------------|----------|---------------|
| <i>Organic acids</i>       |                                              |              |                                          |             |          |               |
| 1                          | <b>Succinic acid**ab</b>                     | <b>7.68</b>  | <b>148, 174, 149, 247, 129, 107, 133</b> | <b>148</b>  | <b>2</b> | <b>STD/MS</b> |
| 2                          | Lactic acid                                  | 5.2          | 117, 146, 148, 191, 234, 190, 133        | 117         | 2        | STD/MS        |
| <i>Alcohols</i>            |                                              |              |                                          |             |          |               |
| 3                          | Propanediol                                  | 5.13         | 115, 130, 151, 148, 177, 149, 133        | 115         | 2        | MS            |
| 4                          | Glycerol alpha-monochlorohydrin <sup>a</sup> | 6.51         | 116, 101, 151, 103, 148, 117, 131        | 116         | 2        | MS            |
| 5                          | <b>Glycerol<sup>ab</sup></b>                 | <b>7.34</b>  | <b>117, 205, 103, 133, 148, 218, 149</b> | <b>117</b>  | <b>3</b> | <b>STD/MS</b> |
| <i>Lipids</i>              |                                              |              |                                          |             |          |               |
| 6                          | Hydroxybutyric acid <sup>a</sup>             | 6.94         | 148, 174, 117, 189, 149, 233, 133        | 148         | 2        | MS            |
| 7                          | Pentadecanoic acid                           | 12.4         | 117, 129, 132, 145, 131, 299, 118        | 117         | 1        | MS            |
| 8                          | Palmitic acid <sup>a</sup>                   | 13.22        | 117, 132, 129, 145, 131, 313, 118        | 117         | 1        | STD/MS        |
| 9                          | <b>Oleanitrile<sup>ab</sup></b>              | <b>13.51</b> | <b>122, 136, 150, 110, 123, 108, 137</b> | <b>122</b>  | <b>0</b> | <b>MS</b>     |
| 10                         | <b>Stearic acid<sup>ab</sup></b>             | <b>14.41</b> | <b>117, 132, 129, 131, 145, 116, 133</b> | <b>117</b>  | <b>1</b> | <b>STD/MS</b> |
| 11                         | <b>Oleamide<sup>ab</sup></b>                 | <b>15.42</b> | <b>131, 144, 116, 128, 198, 145, 115</b> | <b>131</b>  | <b>1</b> | <b>STD/MS</b> |
| <i>Etc.</i>                |                                              |              |                                          |             |          |               |
| 12                         | Borate                                       | 4.44         | 221, 222, 263, 133, 223, 175, 191        | 221         | 3        | MS            |
| 13                         | Phenol <sup>a</sup>                          | 5.14         | 151, 207, 166, 115, 130, 152, 148        | 151         | 1        | MS            |
| 14                         | Hydroxylamine                                | 5.78         | 133, 146, 119, 249, 130, 100, 134        | 133         | 3        | STD/MS        |
| 15                         | <b>Cyclohexenone<sup>ab</sup></b>            | <b>5.91</b>  | <b>138, 139, 123, 110, 115, 108, 124</b> | <b>138</b>  | <b>0</b> | <b>MS</b>     |
| 16                         | Urea                                         | 6.96         | 189, 171, 148, 149, 100, 190, 174        | 189         | 2        | STD/MS        |
| 17                         | Benzoic acid                                 | 7.09         | 179, 105, 135, 80, 136, 194, 106         | 179         | 1        | MS            |
| 18                         | <b>Phosphoric acid<sup>ab</sup></b>          | <b>7.37</b>  | <b>299, 133, 300, 314, 301, 193, 207</b> | <b>299</b>  | <b>3</b> | <b>STD/MS</b> |
| 19                         | Tris(hydroxymethyl)propane                   | 8.47         | 174, 191, 113, 110, 100, 175, 156        | 174         | 3        | MS            |
| <i>Non-identifications</i> |                                              |              |                                          |             |          |               |
| 20                         | N.I.1                                        | 5.63         | 105, 136, 204, 103, 148, 116, 106        | 105         | -        | -             |
| 21                         | N.I.2                                        | 5.65         | 204, 148, 149, 131, 205, 133, 105        | 204         | -        | -             |
| 22                         | N.I.3 <sup>a</sup>                           | 6.03         | 133, 148, 100, 220, 146, 235, 160        | 133         | -        | -             |
| 23                         | N.I.4                                        | 7.64         | 107, 256, 140, 120, 118, 186, 153        | 107         | -        | -             |
| 24                         | N.I.5                                        | 7.95         | 184, 134, 285, 100, 185, 135, 118        | 184         | -        | -             |
| 25                         | N.I.6 <sup>a</sup>                           | 9.43         | 180, 110, 200, 101, 127, 270, 103        | 180         | -        | -             |
| 26                         | N.I.7 <sup>a</sup>                           | 9.74         | 263, 264, 278, 265, 115, 207, 175        | 263         | -        | -             |
| 27                         | N.I.8                                        | 11.06        | 154, 146, 242, 130, 156, 157, 118        | 154         | -        | -             |
| 28                         | N.I.9 <sup>a</sup>                           | 14.26        | 160, 314, 130, 117, 315, 144, 161        | 160         | -        | -             |
| 29                         | <b>N.I.10<sup>ab</sup></b>                   | <b>14.31</b> | <b>131, 144, 116, 128, 117, 115, 145</b> | <b>131</b>  | -        | -             |
| 30                         | N.I.11 <sup>a</sup>                          | 15.69        | 314, 160, 358, 117, 204, 130, 100        | 314         | -        | -             |
| 31                         | N.I.12                                       | 17.45        | 131, 144, 116, 128, 132, 115, 145        | 131         | -        | -             |

130 \*, Total 31 primary metabolites were identified;

131 Organic acids: 2, Alcohols: 3, Lipids: 6, Etc: 8, Non-identifications: 12.

132 \*\*, Bold font indicates metabolites that show significant differences between B (non-plasma

133 treated bacteria) and PB (plasma treated bacteria) groups  
134 a, VIP1, 2 > 0.7  
135 b, *P*-value < 0.05)  
136  
137

138  
139

**Supplementary Table S6.** Assessment of disease severity and percentage of dead leaves

| Disease severity (1-5)     |         |      |      |              |         |   |    | Total number of dead leaves                                                                                                         |      |      |
|----------------------------|---------|------|------|--------------|---------|---|----|-------------------------------------------------------------------------------------------------------------------------------------|------|------|
| Plant number               | Control | B    | PB   | Plant number | Control | B | PB | Control                                                                                                                             | B    | PB   |
| 1                          | 5       | 5    | 5    | 31           | 3       | 1 | 5  | 17                                                                                                                                  | 11   | 8    |
| 2                          | 5       | 5    | 4    | 32           | 3       | 3 | 5  | <b>Average percentage of dead leaves in individual plant (%); (total number of dead leaves / total number of plants (60)) x 100</b> |      |      |
| 3                          | 5       | 5    | 3    | 33           | 4       | 3 | 3  |                                                                                                                                     |      |      |
| 4                          | 4       | 5    | 2    | 34           | 2       | 3 | 3  |                                                                                                                                     |      |      |
| 5                          | 4       | 5    | 2    | 35           | 1       | 2 | 4  |                                                                                                                                     |      |      |
| 6                          | 4       | 4    | 3    | 36           | 2       | 3 | 2  |                                                                                                                                     |      |      |
| 7                          | 3       | 3    | 2    | 37           | 2       | 2 | 3  |                                                                                                                                     |      |      |
| 8                          | 2       | 3    | 1    | 38           | 2       | 3 | 3  | 28.3                                                                                                                                | 18.3 | 13.3 |
| 9                          | 5       | 2    | 3    | 39           | 5       | 3 | 4  |                                                                                                                                     |      |      |
| 10                         | 3       | 3    | 2    | 40           | 5       | 2 | 2  |                                                                                                                                     |      |      |
| 11                         | 4       | 5    | 5    | 41           | 4       | 3 | 4  |                                                                                                                                     |      |      |
| 12                         | 2       | 5    | 4    | 42           | 4       | 3 | 3  |                                                                                                                                     |      |      |
| 13                         | 3       | 4    | 2    | 43           | 5       | 2 | 3  |                                                                                                                                     |      |      |
| 14                         | 3       | 4    | 3    | 44           | 4       | 1 | 3  |                                                                                                                                     |      |      |
| 15                         | 4       | 4    | 4    | 45           | 5       | 2 | 4  |                                                                                                                                     |      |      |
| 16                         | 5       | 4    | 4    | 46           | 5       | 3 | 2  |                                                                                                                                     |      |      |
| 17                         | 5       | 4    | 4    | 47           | 4       | 2 | 1  |                                                                                                                                     |      |      |
| 18                         | 5       | 4    | 3    | 48           | 3       | 3 | 3  |                                                                                                                                     |      |      |
| 19                         | 5       | 3    | 5    | 49           | 4       | 2 | 2  |                                                                                                                                     |      |      |
| 20                         | 4       | 3    | 3    | 50           | 4       | 5 | 1  |                                                                                                                                     |      |      |
| 21                         | 3       | 5    | 2    | 51           | 4       | 2 | 1  |                                                                                                                                     |      |      |
| 22                         | 3       | 5    | 5    | 52           | 2       | 2 | 2  |                                                                                                                                     |      |      |
| 23                         | 2       | 5    | 1    | 53           | 2       | 1 | 2  |                                                                                                                                     |      |      |
| 24                         | 3       | 4    | 1    | 54           | 3       | 3 | 1  |                                                                                                                                     |      |      |
| 25                         | 4       | 3    | 3    | 55           | 5       | 2 | 1  |                                                                                                                                     |      |      |
| 26                         | 4       | 3    | 2    | 56           | 3       | 3 | 2  |                                                                                                                                     |      |      |
| 27                         | 5       | 3    | 5    | 57           | 4       | 3 | 4  |                                                                                                                                     |      |      |
| 28                         | 5       | 3    | 5    | 58           | 4       | 1 | 2  |                                                                                                                                     |      |      |
| 29                         | 3       | 2    | 4    | 59           | 4       | 1 | 1  |                                                                                                                                     |      |      |
| 30                         | 4       | 2    | 4    | 60           | 5       | 3 | 1  |                                                                                                                                     |      |      |
| <b>Average</b>             | 3.72    | 3.12 | 2.88 |              |         |   |    |                                                                                                                                     |      |      |
| <b>Standard deviation.</b> | 1.09    | 1.19 | 1.29 |              |         |   |    |                                                                                                                                     |      |      |

140 **Control:** water inoculated rice seedlings, **B:** rice seedlings infected with untreated bacteria,  
141 **PB:** rice seedlings infected with plasma treated (air plasma for 3 min) bacteria.

142 **Supplementary Table S7.** Results of sequencing for bacterial genome  
 143

| Chromo-<br>some | Position | Ref <sup>1</sup> | Alt <sup>2</sup> | Quality <sup>3</sup> | Hom/<br>Het <sup>4</sup> | Read<br>Depth <sup>5</sup> | Alt<br>Depth <sup>6</sup> | Gene<br>Name | Gene<br>ID | Start   | End     |
|-----------------|----------|------------------|------------------|----------------------|--------------------------|----------------------------|---------------------------|--------------|------------|---------|---------|
| contig1         | 614681   | G                | T                | 134                  | het                      | 243                        | 53                        | spo0B        | 00704      | 614509  | 615087  |
| contig1         | 1621694  | T                | C                | 222                  | het                      | 280                        | 99                        | spo0F        | 01737      | 1621485 | 1621859 |
| contig1         | 4224357  | G                | C                | 225                  | hom                      | 185                        | 185                       | cwIS         | 04342      | 4223490 | 4224734 |

- 144 1 Reference sequence regarding specific position  
 145 2 DNA sequence of the sample  
 146 3 Phred-scaled probability of all samples being homozygous reference. (The value is in-log.  
 147 The smaller the value, the more likely ALT is wrong.)  
 148 4 Shows genotype "hom" means non-reference homozygote, "het" means heterozygote.  
 149 Homozygous: The circumstances when there are mutations on most reads that are mapped to  
 150 certain region.  
 151 Heterozygous: The circumstances when there are mutations on some reads that are mapped  
 152 to certain region.  
 153 5 Total read depth.  
 154 6 Allelic depths for the ref and alt alleles in the order listed.  
 155  
 156



157  
158

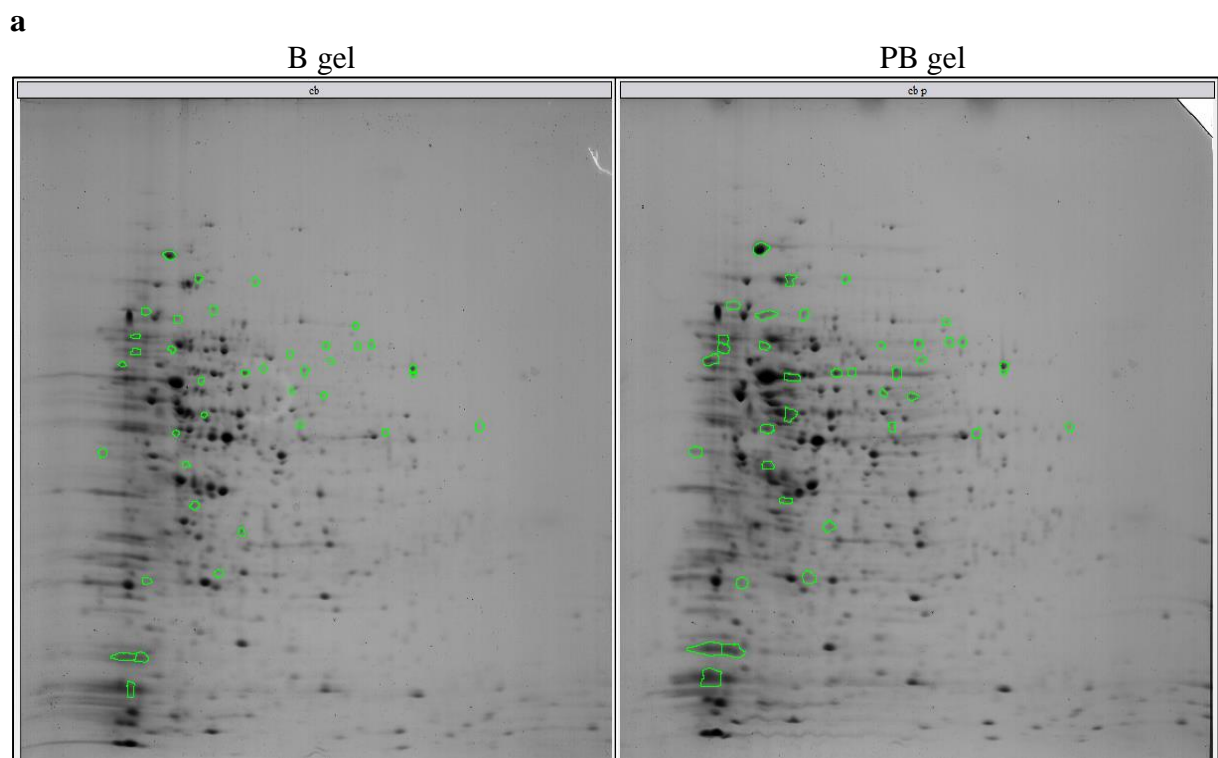

159  
160  
161  
162

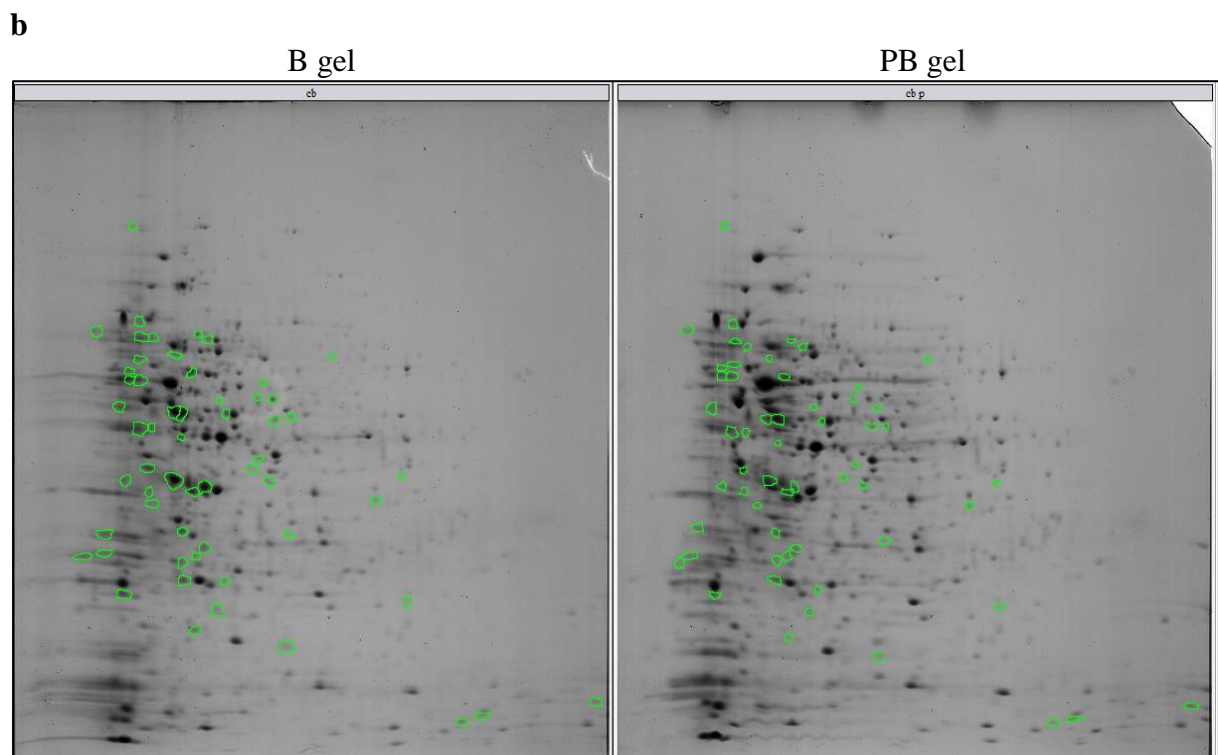

163  
164  
165  
166  
167  
168  
169

**Supplementary Figure S1.** **a.** Group spots showing more than 2-fold increased intensity in PB (Plasma treated bacteria) compared to B (bacteria) gel. **b.** Group spots showing more than 2-fold decreased intensity in PB compared to B gel

170  
171

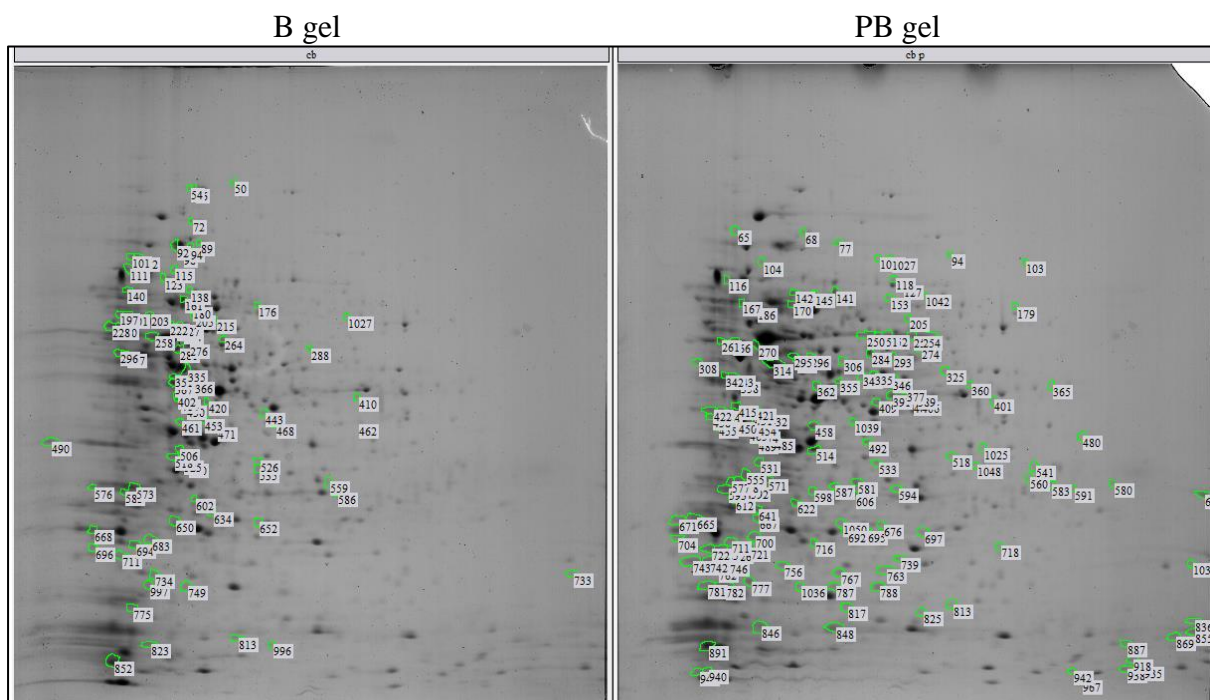

172  
173  
174  
175  
176  
177

**Supplementary Figure S2.** Group spots shown in only PB (Plasma treated bacteria) gel and in only B (bacteria) gel.

178

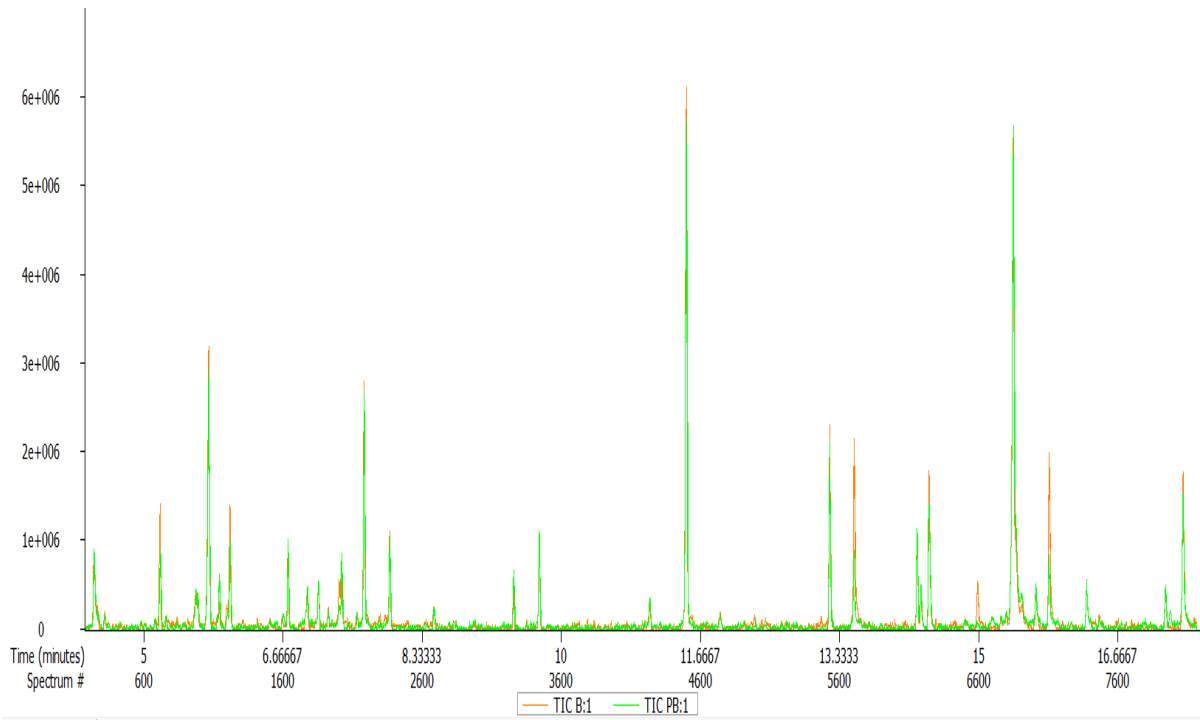

179

180 **Supplementary Figure S3.** GC-TOF-MS chromatogram of primary metabolites extracted  
181 from B (bacteria) and PB (plasma treated bacteria). Orange and green lines represent bacteria  
182 and plasma treated bacteria sample, respectively.  
183

184 a

### Multivariate analysis

●: B ●: PB

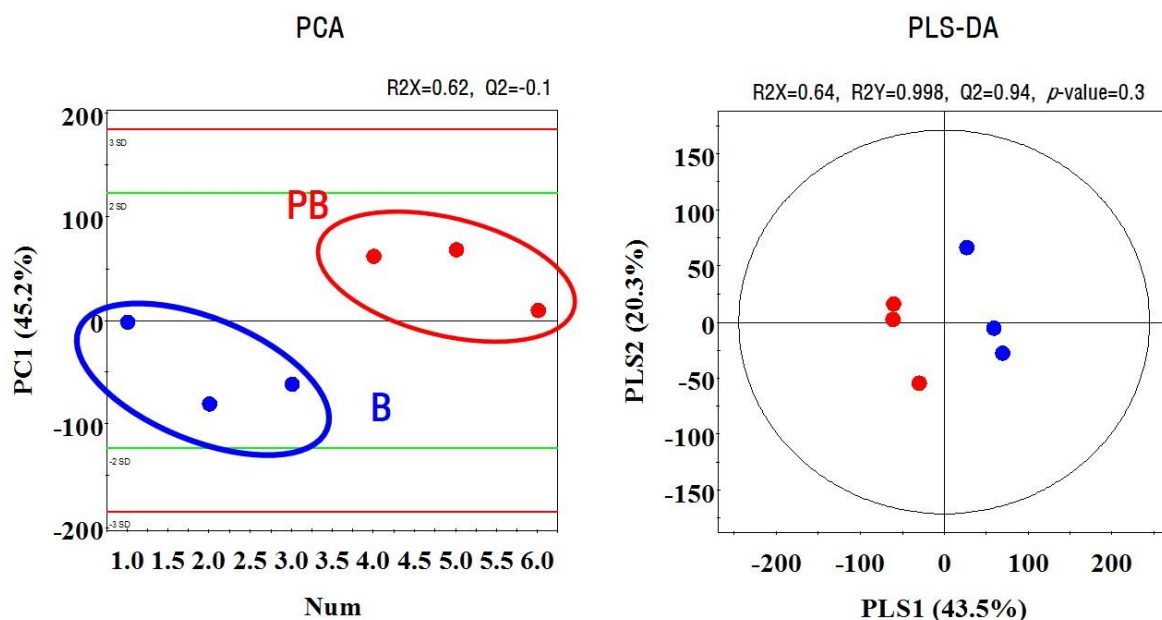

185

186 b

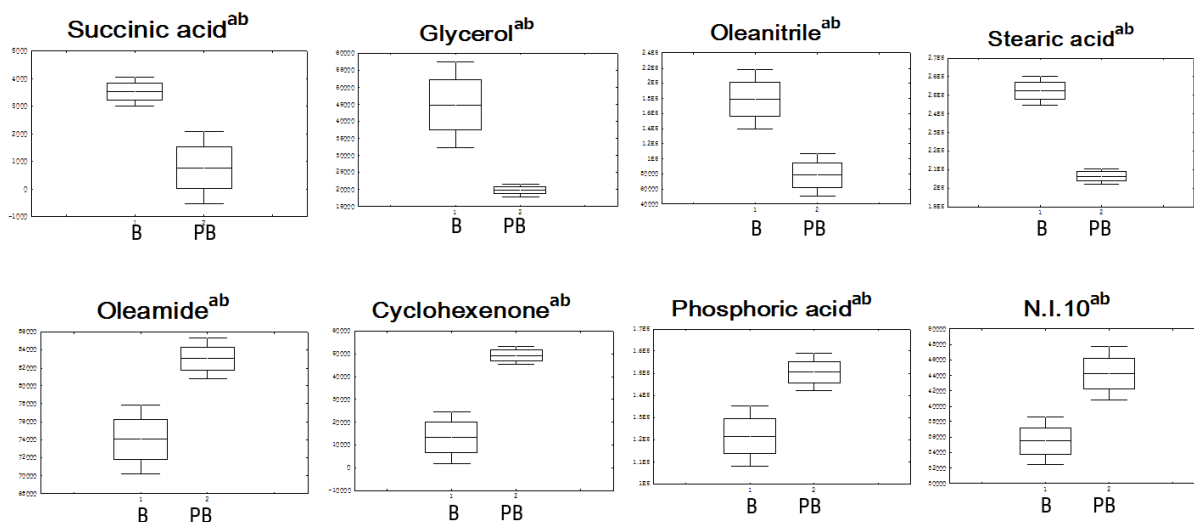

187

188 **Supplementary Figure S4.** a. Plots of PCA and PLS-DA analysis. b. Primary metabolites  
189 that show significant differences in amount between B (bacteria) and PB (plasma treated  
190 bacteria) groups. a, VIP1, 2 > 0.7 b, P-value < 0.05)

191
